# Supplementary material for: Post-transcriptional air pollution oxidation to the cholesterol biosynthesis pathway promotes pulmonary stress phenotypes
Source: PubMed Central journal article supplement (PMC7376215; doi:10.1038/s42003-020-01118-6), 2020-07-22
Supplement: 42003_2020_1118_MOESM2_ESM.pdf [file 42003_2020_1118_MOESM2_ESM.pdf]

## Description of Additional Supplementary Files

### **File Name: Supplementary Data 1 – 15**

**Description:** Transcripts and pathways lists underlying the 8-oxoG RIP-seq and transcriptomics analysis described in the main document and supplementary figures

**Supplementary Data 1.** List of significantly upregulated transcripts upon exposure at low-level mixture

**Supplementary Data 2.** List of significantly downregulated transcripts upon exposure at low-level mixture

**Supplementary Data 3.** List of air pollution-induced oxidized transcripts at low-level mixture

**Supplementary Data 4.** List of enriched KEGG pathways in significantly oxidized transcripts upon exposure at low-level mixture

**Supplementary Data 5.** List of air pollution-induced oxidized transcripts with significant downregulation at low-level mixture

**Supplementary Data 6.** List of air pollution-induced oxidized transcripts at high-level mixture

**Supplementary Data 7.** List of overlapped air pollution-induced oxidized transcripts between the low-level and high-level exposures

**Supplementary Data 8.** List of enriched KEGG pathways in significantly oxidized transcripts upon exposure at high-level mixture

**Supplementary Data 9.** List of enriched KEGG pathways in upregulated transcripts upon exposure at low-level mixture

**Supplementary Data 10.** List of enriched KEGG pathways in downregulated transcripts upon exposure at low-level mixture

**Supplementary Data 11.** List of significantly upregulated transcripts upon exposure at high-level mixture

**Supplementary Data 12.** List of significantly downregulated transcripts upon exposure at high-level mixture

**Supplementary Data 13.** List of air pollution-induced oxidized transcripts with significant downregulation at high-level mixture

**Supplementary Data 14.** List of enriched KEGG pathways in upregulated transcripts upon exposure at high-level mixture

**Supplementary Data 15.** List of enriched KEGG pathways in downregulated transcripts upon exposure at high-level mixture

### **File Name: Supplementary Data 16**

**Description:** All source of data underlying the graphs presented in the main figures
